# Supplementary material
Source: Research Square preprint supplement (doi:10.21203/rs.3.rs-8722507/v1)
Supplement: Supplementary file 1 [file 8199293e70e0e7ace163b56f.docx]

| **Parameter** | **Base-case value** | **Tested range (±20%)** | **Threshold for ILR to be cost-effective** | **Policy implication** |
| --- | --- | --- | --- | --- |
| **ILR surgical tariff (SE821L, per procedure)** | S$24,700 | S$20,000–29,500 | ILR requires an operative tariff of **≈S$13,000–16,000** to reach WTP **S$50,000–75,000/QALY** (i.e. ≥35–45% reduction from current lower-bound tariff) | Under current MOH fee benchmarks, ILR remains far above acceptable WTP bands even if tariffs are trimmed within realistic bounds. |
| **Baseline 10-year BCRL incidence after ALND** | 0.30 | 0.24–0.36 | ILR only approaches cost-effectiveness when baseline incidence is **≥0.5–0.7**, depending on the WTP threshold (≈0.52 at S$50k/QALY; ≈0.71 at S$75k/QALY) | Real-world Singapore incidence (≈30%) is already at the upper end of international estimates; further “inflating” risk to rescue ILR is not clinically defensible. |
| **Annual utility decrement for established BCRL** | 0.08 | 0.06–0.10 | Even at the upper end of published disutility (≈0.10–0.12 per year), ILR’s ICER remains well above **S$75,000/QALY** | Existing QoL data do not support the extreme disutility needed to make ILR cost-effective. |
| **LVA utilisation in surveillance arm** | 25% of BCRL cases | 20–30% | Varying LVA uptake within this range changes ILR ICER by **<S$10,000/QALY** and never brings it below **S$100,000/QALY** | Reasonable variation in downstream surgical rescue (LVA) does not rescue ILR economically. |

ILR = immediate lymphatic reconstruction; BCRL = breast cancer–related lymphoedema; WTP = willingness to pay.

**Table 1.** Policy-relevant parameters and thresholds at which immediate lymphatic reconstruction (ILR) becomes cost-effective relative to structured surveillance. All values reflect a 10-year discounted horizon. Thresholds assume willingness-to-pay of S$50,000–S$75,000/QALY. ILR remains above these thresholds under all plausible parameter ranges evaluated. Abbreviations: BCRL, breast cancer–related lymphoedema; LVA, lymphovenous anastomosis; WTP, willingness to pay; QALY, quality-adjusted life-year.
