# Supplementary material
Source: Research Square preprint supplement (doi:10.21203/rs.3.rs-8722507/v1)
Supplement: Supplementary file 2 [file aa3fdabcf78bad449e14f9c2.docx]

| S**trategy** | **Mean Cost (S$)** | **Mean QALY** | **Incremental Cost (S$)*** | **Incremental QALY*** | **ICER (S$/QALY)** | **Cost‑effective at S$50k/QALY?** |
| --- | --- | --- | --- | --- | --- | --- |
| Opportunistic detection | 5150 | 7.86 | – | – | – | – |
| Structured surveillance | 5000 | 7.90 | -150 | +0.04 | Dominant | Yes |
| Immediate lymphatic reconstruction | 25,650 | 8.00 | +20,650 | +0.10 | 206,500 | No |

*Incremental values for structured surveillance are relative to opportunistic detection; incremental values for ILR are relative to structured surveillance.

**Table 2.** **Base-case cost-effectiveness results over a 10-year horizon (3% discounting).** Structured surveillance is more effective and less costly than opportunistic detection (dominant). ILR yields small incremental benefit (+0.10 QALYs) but substantially higher cost (+S$20,650), resulting in an ICER of S$206,500/QALY, above Singapore thresholds. Abbreviations: ILR, immediate lymphatic reconstruction; ICER, incremental cost-effectiveness ratio; QALY, quality-adjusted life-year; WTP, willingness to pay.
