# Supplementary material
Source: Research Square preprint supplement (doi:10.21203/rs.3.rs-8722507/v1)
Supplement: Supplementary file 3 [file b6c39c8f8429db4329fd7665.docx]

**Supplementary material**

**Supplementary Figure S1a**. **One-way sensitivity analysis (tornado plot) for immediate lymphatic reconstruction (ILR) vs structured surveillance.** Bars reflect absolute changes in incremental cost-effectiveness ratio (ICER) when each parameter is varied across its plausible range. The vertical reference line shows the base-case ICER of S$206,500/QALY. ILR tariff, baseline BCRL incidence, and utility decrement exert the largest influence; none of the parameter ranges reduce the ICER to within common Singapore willingness-to-pay (WTP) thresholds (S$50k–S$75k/QALY). Abbreviations: ILR, immediate lymphatic reconstruction; BCRL, breast cancer–related lymphoedema; QALY, quality-adjusted life-year.

**Supplementary Figure S1b.** **One-way sensitivity analysis (tornado plot) for structured surveillance vs opportunistic detection.** Surveillance remains cost-saving and more effective across all parameter ranges. Baseline BCRL incidence, surveillance test sensitivity, and long-term garment use have the largest influence, but no plausible variation changes the conclusion of dominance. Abbreviations: BCRL, breast cancer–related lymphoedema; CDT, complete decongestive therapy; LVA, lymphovenous anastomosis.

| ****Model type**** | ****Structure**** | ****Cycle length / time horizon**** | ****Mean ICER (ILR vs Surveillance, S$/QALY)**** | Difference vs Decision Tree | ****Comment**** |
| --- | --- | --- | --- | --- | --- |
| Decision Tree | Single surgical decision with aggregated 10-year costs and QALYs | N/A / 10 years | 206,500 | – | Base-case framework; surveillance is dominant versus opportunistic detection |
| Semi-Markov (2-state) | Annual transitions between “No BCRL” and “BCRL ± Cellulitis” states | 1 year / 10 years | 209,000 | + 1.2 % | Small effect on ICER; confirms structural equivalence and robustness |

**Supplementary Table S1. Comparison of decision-tree and semi-Markov structures.** A semi-Markov replication yielded only +1.2% change in ICER (209,000 vs 206,500 S$/QALY), confirming structural robustness. Abbreviations: ICER, incremental cost-effectiveness ratio; ILR, immediate lymphatic reconstruction; QALY, quality-adjusted life-year.

| Parameters | Base Value | Distribution | Range (Low–High) | Source / Rationale |
| --- | --- | --- | --- | --- |
| Baseline 10-year BCRL risk | 0.30 | Beta | 0.20–0.40 | Hing et al. [1]; DiSipio et al. [2] |
| ILR relative risk | 0.28 | Log-normal | 0.15–0.40 | Hill et al.[6]; Chun et al. [7] |
| Detection sensitivity (BIS±ICG-L) | 0.85 | Beta | 0.75–0.95 | Akita et al. [19] (ICG-L); Ridner et al. [29] (BIS) |
| Detection specificity (BIS±ICG-L) | 0.90 | Beta | 0.80–0.97 | Akita et al. [19]; Ridner et al. [29] |
| Progression to clinical BCRL (1y) | 0.40 | Beta | 0.20–0.60 | Soran et al. [20] |
| Annual cellulitis (moderate BCRL) | 0.30 | Gamma | 0.15–0.60 | Cheng et al. [14] |
| Annual cellulitis hospitalisation rate | 0.03 | Beta | 0–0.10 | National BCRL/Chronic-oedema cohorts.[15,16] Wide range for uncertainty |
| Cellulitis admission cost | 3500 | Gamma | 2000–5000 | MOH DRG J64A/B median bill sizes, subsidized and private-class mix |
| ILR and LVA tariff | 24,700 | Gamma | 20,000–35,500 | MOH benchmarks [8–10] |
| ICG-L study cost | 900 | Gamma | 300–900 | CGH reference |
| ICG-L confirmatory mapping frequency | 0.30 | Beta | 0.10 – 0.50 | Triggered by abnormal BIS; CGH protocol |
| Proportion of BCRL cases receiving LVA (opportunistic) | 0.50 | Beta | 0.30–0.70 | CGH registry data; higher escalation in late detected disease |
| Proportion of BCRL cases receiving LVA (Surveillance/ILR) | 0.25 | Beta | 0.15–0.35 | CGH registry data; Assume early disease and same proportion requiring LVA for the group who failed ILR and develop BCRL |
| BIS frequency (per year) | 2.0 | Fixed | _ | Prospective surveillance standards; Yang et al. [26]; Ridner et al. [29] |
| CDT cost per session | 201 | Gamma | 160–250 | CGH reference |
| Annual garment cost | 600 | Gamma | 300–900 | Singapore retail cost observations (no external reference) |
| Utility: no/mild BCRL | 0.88 | Beta | 0.84–0.92 | Norman et al. [13]; Gillespie et al. [12]. EQ-5D survivor studies |
| Utility: moderate/severe BCRL | 0.70 | Beta | 0.60–0.80 | Norman et al. [13]; Jonis et al. [25] |

# **Supplementary Table S2. Model parameters, base-case values, ranges, and probability distributions used in probabilistic sensitivity analysis (PSA).** This table lists all epidemiologic, diagnostic, utility, and cost inputs used in the model, together with plausible ranges and assigned distributions for PSA. Where available, parameters were informed by meta-analyses, Singapore Ministry of Health tariff benchmarks, Changi General Hospital utilisation data, and published clinical studies. For parameters lacking strong empirical data, conservative uncertainty ranges (±20–30%) were applied. Abbreviations: BCRL, breast cancer–related lymphoedema; CDT, complete decongestive therapy; ICG-L, indocyanine green lymphography; BIS, bioimpedance spectroscopy; ILR, immediate lymphatic reconstruction; LVA, lymphovenous anastomosis; PSA, probabilistic sensitivity analysis; QALY, quality-adjusted life-year.

| Parameter | Structured Surveillance | ILR |
| --- | --- | --- |
| BCRL incidence (10-year) | 0.17 | 0.084 |
| Utility decrement (annual) | 0.08 | 0.08 |
| Discounted 10-year utility weight (D) | 0.246 | 0.246 |
| Discounted utility loss per BCRL case | 0.08 x 0.246 = 0.0197 | 0.0197 |
| Expected discounted utility loss (p x Qloss) | 0.017 x 0.0197 = 0.00335 | 0.084 x 0.0197 = 0.00165 |
| Discounted QALYs (Baseline 8.00) | 8.00 – 0.00335 = 7.9966  ≈8.00 | 8.00 – 0.00165 = 7.9983  ≈8.00 |
| ΔQALY (ILR – Surveillance) | – | ≈0.0017 |

**Supplementary Table S3. Derivation of 10-year discounted QALYs for structured surveillance and ILR.** This table presents annual utilities, discounting factors, and cumulative QALY totals for structured surveillance and immediate lymphatic reconstruction.
Structured surveillance yielded 7.90 QALYs, reflecting reduced progression to chronic BCRL through early detection.
ILR yielded 8.00 QALYs, consistent with its lower residual BCRL risk. All utilities were derived from EQ-5D–based survivorship studies. Abbreviations: BCRL, breast cancer–related lymphoedema; ILR, immediate lymphatic reconstruction; QALY, quality-adjusted life-year.

| Parameter | Opportunistic | Surveillance |
| --- | --- | --- |
| BCRL incidence (10-year) | 0.30 | 0.17 |
| Utility decrement (annual) | 0.08 | 0.08 |
| Discounted 10-year utility loss | 0.240 | 0.136 |
| Discounted QALYs (baseline 8.00 possible) | 7.86 | 7.90 |
| ΔQALY (Surveillance – Opportunistic) | – | 0.04 |

**Supplementary Table S4.** **Derivation of 10-year discounted QALYs for opportunistic detection and structured surveillance.** This table shows the QALY calculation for opportunistic detection and structured surveillance, including annual health-state utilities, discount factors, and cumulative totals. Opportunistic detection yielded 7.86 QALYs, reflecting higher rates of chronic BCRL and prolonged utility loss. Structured surveillance yielded 7.90 QALYs, driven by early identification of subclinical lymphatic dysfunction and reduced progression.Abbreviations: BCRL, breast cancer–related lymphoedema; QALY, quality-adjusted life-year.

**Supplementary Figure S2a.** **Cost-effectiveness acceptability curves (CEACs).** CEACs show the probability that each strategy is cost-effective across WTP thresholds from S$0 to S$200,000/QALY. Structured surveillance is cost-effective in >95% of simulations at S$50,000/QALY. ILR never exceeds a 20% probability of cost-effectiveness, even at high WTP values. Vertical reference lines denote Singapore thresholds of S$50,000 and S$75,000 per QALY. Abbreviations: CEAC, cost-effectiveness acceptability curve; ILR, immediate lymphatic reconstruction; QALY, quality-adjusted life-year; WTP, willingness to pay.

Colors: Opportunistic (orange), Surveillance (green), ILR (red). Vertical guides at S$50k and S$75k.

|  |
| --- |

| **Supplementary Figure S2b.** **Incremental cost-effectiveness plane from probabilistic analysis.** Each point represents a PSA draw comparing: (i) structured surveillance vs opportunistic detection (green); (ii) ILR vs structured surveillance (red). Surveillance lies almost entirely in the southeast quadrant (dominant). ILR occupies only the northeast quadrant, lying above WTP thresholds in every simulation. Abbreviations: ICER, incremental cost-effectiveness ratio; ILR, immediate lymphatic reconstruction; QALY, quality-adjusted life-year; PSA, probabilistic sensitivity analysis. |
| --- |

Points: 10,000 PSA samples (subset shown). Colors: Surveillance vs Opportunistic (green), ILR vs Surveillance (red).

Positive INMB indicates the numerator strategy is cost-effective at the given λ.

**Supplementary Figure S3.** **Incremental net monetary benefit (INMB) across WTP thresholds.** INMB(λ) = λ·ΔQALY – ΔCost.
Positive INMB indicates cost-effectiveness at a given λ. Surveillance shows positive INMB across all thresholds. ILR yields strongly negative INMB for WTP values up to S$200,000/QALY; its INMB curve crosses zero only at ~S$170k–200k/QALY, far above realistic Singapore thresholds. Abbreviations: INMB, incremental net monetary benefit; ILR, immediate lymphatic reconstruction; QALY, quality-adjusted life-year; WTP, willingness to pay.
